# Supplementary material for: No association between gluten sensitivity and amyotrophic lateral sclerosis
Source: Springer Nature journal article supplement (doi:10.1007/s00415-017-8400-8), 2017-02-06
Supplement: MOESM1 [file 12046454]

## Online Resource 1

### Quality control of the Project MinE samples and variants

Samples included in Project MinE underwent whole-genome sequencing, genotyping on the Illumina 2.5M, and methylation data collection. Samples underwent QC based on the whole-genome sequencing data.

Samples were checked for the following metrics (with exclusion criteria in parentheses): total depth (no exclusion necessary), transition/transversion ratio ( $>2.09$ ), concordance with genotype data ( $<95\%$ ), phenotype/genotype sex concordance (discordant samples are removed), overall missingness ( $>5\%$ ), inbreeding ( $>3$  standard deviations from the distribution), relatedness (duplicates are removed; related samples with kinship  $> 0.0625$  are dropped for analyses requiring independent samples), total single nucleotide variants ( $> 4M$ ), total indels ( $>900k$ ), total singletons ( $>6$  standard deviations from cohort distribution), and ratio of heterozygotes to homozygous non-reference genotypes ( $>3$ ).

Variants are checked for the following metrics (with exclusion criteria in parentheses): depth of coverage ( $<1.5x/sample$  or  $>34.8x/sample$ ), differential missingness ( $p < 10^{-3}$ ), Hardy-Weinberg equilibrium violations ( $p < 10^{-3}$ ), missingness ( $>5\%$ ), and overall "PASSing rate" (according to Illumina genotype calling pipeline which is performed on a sample-level basis,  $<70\%$  considering all samples).
